# Supplementary material for: Condensin controls cellular RNA levels through the accurate segregation of chromosomes instead of directly regulating transcription
Source: eLife journal article supplement (doi:10.7554/elife.38517), 2018-09-19
Supplement: supp [file elife-38517-supp-v1.zip]

Archive with 14 entries (14 files):
- elife_poa_e38517_Figure_5_figure_supplement_2.pdf
- elife_poa_e38517_Figure_4_figure_supplement_1.pdf
- elife_poa_e38517_Supplementary_File_4.docx
- elife_poa_e38517_Supplementary_File_2.xlsx
- elife_poa_e38517_Supplementary_File_3.docx
- elife_poa_e38517_Figure_7_figure_supplement_2.pdf
- elife_poa_e38517_Figure_2_figure_supplement_2.pdf
- elife_poa_e38517_Transparent_Reporting_File.pdf
- elife_poa_e38517_Supplementary_File_1.docx
- elife_poa_e38517_Figure_2_figure_supplement_1.pdf
- elife_poa_e38517_Figure_7_figure_supplement_1.pdf
- elife_poa_e38517_Supplementary_File_5.xlsx
- elife_poa_e38517_Figure_1_figure_supplement_1.pdf
- elife_poa_e38517_Figure_5_figure_supplement_1.pdf
