# Supplementary material for: Condensin controls cellular RNA levels through the accurate segregation of chromosomes instead of directly regulating transcription
Source: eLife journal article supplement (doi:10.7554/elife.38517), 2018-09-19
Supplement: supp [file elife-38517-supp-v1.zip › elife_poa_e38517_Supplementary_File_2.xlsx]

## Sheet: Feuil1
Supplementary File 2. Yeast strains used in this study
* fission yeast strains (LY); leu-: leu1-32 ; ura- : ura4D18 or DS/E ; ade- : ade6-210 or -216 ; lys- : lys1-131 ; his- : his3D1
Figure	strain number			Genotype*	Origin
Fig. 1, 2	LY113	h-	leu- ura- ade-		our stock
	LY140	h-	leu- ura-	cut14-208	our stock
	LY979	h-	leu- ura- ade-	rrp6Δ::KanR	Jean-Paul Javerzat
	LY2403	h-	leu- ura-	cut14-208 rrp6Δ::KanR	this study
	LY3966	h-	leu- ura- ade- his-	P81nmt1-dis3:KanR	François Bachand
	LY4021	h+	leu- ura- ade-	rrp6-13-MYC::HygroR	this study
	LY4025	h+	leu- ura- ade-	rrp6-13-MYC::HygroR cut3-477	this study
	LY4026	h+	leu- ura-	rrp6-13-MYC::HygroR nda3-KM-311 cut14-208	this study
Fig. 3	LY1238	h-	leu- ura-	cdc10-129	YGRC
	LY4675	h+	ura-	cdc10-129 cut14-208	this study
	LY4476	h-	leu- ura-	cdc25-22 cdc13-GFP-LEU2	this study
	LY4478	h-	leu- ura-	cdc25-22 cdc13-GFP-LEU2 cut14-208	this study
	LY4067	h-	leu- ade-	P41nmt1-slp1:KanR cn2-GFP-LEU2	this study (slp1 from C. Haering)
	LY4070	h-	leu- ade- his-	P41nmt1-slp1:KanR cn2-GFP-LEU2 cut14-208	this study
Fig. 4	C2335	MATa	leu-	brn1::HIS3 ura3::BRN1-HA6::URA3 pGAL-NLS-myc9-TEVprotease-NLS2::TRP1	our stock
	C2455	MATa	leu-	brn1::HIS3 ura3::BRN1(3xTEV622)-HA6::URA3 trp1::pGAL-NLS-myc9-TEVprotease-NLS2::TRP1	our stock
	C3138	MATa		bar1::LEU2 brn1::HIS3 ura3::BRN1-HA6::URA3 pGAL-NLS-myc9-TEVprotease-NLS2::TRP1	this study
	C3139	MATa		bar1::LEU2 brn1::HIS3 ura3::BRN1(3xTEV622)-HA6::URA3 pGAL-NLS-myc9-TEVprotease-NLS2::TRP1	this study
Fig. 5	LY113	h-	leu- ura- ade-		our stock
	LY140	h-	leu- ura-	cut14-208	our stock
	LY4669	h+	leu- ura-	cdc15-140	this study
	LY4672	h-	leu- ura-	cdc15-140 cut14-208	this study
	LY4632	h-	leu-	cut9-665	YGRC
	LY4699	h-	leu-	ptr4-1	YGRC
	LY4706	h-	leu- ura-	mis6-302	YGRC
Fig. 6	LY113	h-	leu- ura- ade-		our stock
	LY1069	h-	leu- ura-	cut3-477	our stock
	LY3185	h-	leu- ura-	cut3-m26	Christian Haering
	LY1261	h+	leu- ura- ade-	cnd1-175	our stock
	LY3186	h-	leu- ura-	cut3-i23	Christian Haering
	LY725	h-	leu- ura- ade-	cut14-90	our stock
	LY140	h-	leu- ura-	cut14-208	our stock
	LY4669	h+	leu- ura-	cdc15-140	this study
	LY4672	h-	leu- ura-	cdc15-140 cut14-208	this study
	LY4632	h-	leu-	cut9-665	YGRC
	LY4699	h-	leu-	ptr4-1	YGRC
	LY4706	h-	leu- ura-	mis6-302	YGRC
Fig. 7	LY113	h-	leu- ura- ade-		our stock
	LY140	h-	leu- ura-	cut14-208	our stock
	LY4706	h-	leu- ura-	mis6-302	YGRC
	LY4924	h+	leu- ura-	gar2-mcherry:KanR ade6<<GFP-Psy1	this study (gar2-mcherry YGRC)
	LY4925	h-	leu- ura-	gar2-mcherry ade6<<GFP-Psy1 cut14-208	this study (gar2-mcherry YGRC)
	LY5001	h+	leu- ura-	gar2-mcherry:KanR ade6<<GFP-Psy1 ptr4-1	this study (gar2-mcherry YGRC)
	LY5248	h-	leu- ura-	gar2-mcherry:KanR ade6<<GFP-Psy1 mis6-302	this study (gar2-mcherry YGRC)
	LY5332	h-	leu- ura- ade-	rrp6-13-MYC:HygroR gar2-GFP::KanR nda3-KM-311	this study
	LY5334	h-	leu- ura- ade-	rrp6-13-MYC:HygroR gar2-GFP::KanR cut14-208 nda3-KM-311	this study
	LY4021	h+	leu- ura- ade-	rrp6-13-MYC:HygroR	this study
	LY4026	h+	leu- ura-	rrp6-13-MYC:HygroR nda3-KM-311 cut14-208	this study
	LY5404	h+	leu- ura-	gar2-GFP::KanR	this study
	LY5405	h-	leu- ura-	gar2-GFP::KanR cut14-208	this study
	C5259	MATa	leu-	brn1::HIS3, ura3::BRN1-HA6::URA3, trp1::pGAL-NLS-myc9-TEVprotease-NLS2::TRP1, DIS3-mNeonGreen::kanMX	this study
	C5260	MATa	leu-	brn1::HIS3, ura3::BRN1(3xTEV622)-HA6::URA3, trp1::pGAL-NLS-myc9-TEVprotease-NLS2::TRP1, DIS3-mNeonGreen::kanMX	this study
Fig. 1-S1	LY113	h-	leu- ura- ade-		our stock
	LY140	h-	leu- ura-	cut14-208	our stock
	LY979	h-	leu- ura- ade-	rrp6Δ::KanR	Jean-Paul Javerzat
	LY1155	h-		pfs2-11	Chris Norbury
Fig. 2-S1	LY113	h-	leu- ura- ade-		our stock
	LY1266	h-	leu- ura- ade-	cnd1-182	our stock
	LY1069	h-	leu- ura-	cut3-477	our stock
	LY3185	h-	leu- ura-	cut3-m26	Christian Haering
	LY1252	h-	leu- ura- ade-	cut14-180	our stock
	LY140	h-	leu- ura-	cut14-208	our stock
	LY979	h-	leu- ura- ade-	rrp6Δ::KanR	Jean-Paul Javerzat
	LY2403	h-	leu- ura-	cut14-208 rrp6Δ::KanR	this study
	LY1155	h-		pfs2-11	Chris Norbury
	LY3966	h-	leu- ura- ade- his-	P81nmt1-dis3:KanR	François Bachand
Fig. 2-S2	LY8	h-	ura-		our stock
	LY1613	h-	ura-	psm3-GFP::NatR	our stock
	LY5989	h-	ura-	psm3-GFP::NatR cut14-208	this study
	LY5991	h-	ura-	psm3-GFP::NatR cdc15-140	this study
	LY5993		ura-	psm3-GFP::NatR cdc15-140 cut14-208	this study
Fig. 4-S1	C1	MATa	leu- ura- his- trp-	wild-type	Kim Nasmyth
	C1039	MATa	leu- ura- his-	pGAL-NLS-myc9-TEVprotease-NLS2::TRP1	Kim Nasmyth
	C1584	MATa	leu- ura- trp-	BRN1-HA6::HIS3	Kim Nasmyth
	C1597	MATa	leu- ura- his- trp-	SMC2-PK6::KanR	Kim Nasmyth
	C2455	MATa	leu-	brn1::HIS3 ura3::BRN1(3xTEV622)-HA6::URA3 trp1::pGAL-NLS-myc9-TEVprotease-NLS2::TRP1	our stock
Fig. 5-S1	LY4764	h-	leu- ura-	cdc2-as-M17 cdc10-129	this study
	LY4766	h-	leu- ura-	cdc2-as-M17 cdc10-129 cut14-208	this study
	LY113	h-	leu- ura- ade-		our stock
	LY1069	h-	leu- ura-	cut3-477	our stock
	LY3185	h-	leu- ura-	cut3-m26	Christian Haering
	LY1261	h+	leu- ura- ade-	cnd1-175	our stock
	LY3186	h-	leu- ura-	cut3-i23	Christian Haering
	LY725	h-	leu- ura- ade-	cut14-90	our stock
	LY140	h-	leu- ura-	cut14-208	our stock
Fig. 5-S2	LY113	h-	leu- ura- ade-		our stock
	LY140	h-	leu- ura-	cut14-208	our stock
	LY4669	h+	leu- ura-	cdc15-140	this study
	LY4672	h-	leu- ura-	cdc15-140 cut14-208	this study
	LY979	h-	leu- ura- ade-	rrp6Δ::KanR	Jean-Paul Javerzat
	LY5222	h-	leu- ura- ade-	rrp6Δ::KanR cdc15-140	this study
	LY4727	h+	leu- ura- ade-	cdc12-112	this study
	LY4857	h-	leu- ura-	cdc12-112 cut14-208	this study
Fig. 7-S1	LY4944	h+	leu- ura-	rad22-GFP	our stock
	LY4949		leu- ura-	rad22-GFP cut14-208	this study
	LY4951		leu- ura-	rad22-GFP cdc15-140	this study
	LY4953		leu- ura-	rad22-GFP cdc15-140 cut14-208	this study
	LY5118	h-	leu- ura-	rad22-GFP nda3-KM-311	this study
	LY4924	h+	leu- ura-	gar2-mcherry:KanR ade6<<GFP-Psy1	this study (gar2-mcherry YGRC)
	LY4925	h-	leu- ura-	gar2-mcherry ade6<<GFP-Psy1 cut14-208	this study (gar2-mcherry YGRC)
	LY5003	h+	leu- ura-	gar2-mcherry ade6<<GFP-Psy1 cdc15-140	this study
	LY5023	h+	leu- ura-	gar2-mcherry ade6<<GFP-Psy1 cdc15-140 cut14-208	this study
	LY2266	h-	ura-	dis3-HA:KanR	Jean-Paul Javerzat
	LY2859	h-	ura-	dis3-HA:KanR cut14-208	this study
Fig. 7-S2	C5259	MATa	leu-	brn1::HIS3, ura3::BRN1-HA6::URA3, trp1::pGAL-NLS-myc9-TEVprotease-NLS2::TRP1, DIS3-mNeonGreen::kanMX	this study
	C5260	MATa	leu-	brn1::HIS3, ura3::BRN1(3xTEV622)-HA6::URA3, trp1::pGAL-NLS-myc9-TEVprotease-NLS2::TRP1, DIS3-mNeonGreen::kanMX	this study
