# Supplementary material for: Condensin controls cellular RNA levels through the accurate segregation of chromosomes instead of directly regulating transcription
Source: eLife journal article supplement (doi:10.7554/elife.38517), 2018-09-19
Supplement: supp [file elife-38517-supp-v1.zip › elife_poa_e38517_Supplementary_File_5.xlsx]

## Sheet: G1 (Fig. 4B)
Table S5. Microarray analysis G1-arrested cells
id	tx_ID	seqName	strand	first	last	type	name	mappedType	source	Brn1_repeat01	Brn1_repeat02	Brn1_repeat03	Brn1(TEV)_repeat01	Brn1(TEV)_repeat02	Brn1(TEV)_repeat03	average Brn1	average Brn1(TEV)	logRatio
5902	ST5902	12	-	248597	249757	ORF-T	YLR054C	bothEndsMapped	Manual	-3.48117	-2.59869	-2.09485	-5.08599	-5.03483	-5.04824	-2.34677	-5.04154	-2.69477
4501	ST4501	5	-	52349	52485	CUTs	CUT544	mapped3	Automatic	-4.43256	-3.21128	-4.46924	-5.30533	-7.65787	-5.12852	-3.84026	-6.39319	-2.55293
151	ST0151	2	+	407335	410687	ORF-T	YBR083W	bothEndsMapped	Manual	0.166661	0.534039	-4.84896	-0.519322	-4.52882	-4.72394	-2.15746	-4.62638	-2.46892
2138	ST2138	12	+	105401	105545	CUTs	CUT247	mapped3	Automatic	-5.83515	-5.87913	-3.4531	-6.19907	-8.21444	-4.83796	-4.66612	-6.5262	-1.86008
6627	ST6627	14	-	777520	779200	ORF-T	YNR074C	bothEndsMapped	Manual	-3.08368	-2.43884	-1.02514	-1.8393	-2.45676	-4.04674	-1.73199	-3.25175	-1.51976
3450	ST3450	16	+	404243	404419	SUTs	SUT407	bothEndsMapped	Manual	-5.54183	-3.48487	-3.54037	-3.15808	-5.31097	-4.52692	-3.51262	-4.91895	-1.40633
5202	ST5202	8	-	386606	386734	CUTs	CUT651	mapped3	Automatic	-5.29801	-4.13431	-4.71461	-6.09072	-5.04489	-6.31474	-4.42446	-5.67981	-1.25535
5197	ST5197	8	-	378126	379886	ORF-T	YHR139C	bothEndsMapped	Manual	-5.14519	-3.55026	-3.84973	-4.74112	-4.43079	-5.39266	-3.7	-4.91173	-1.21173
2492	ST2492	13	+	239025	239225	CUTs	CUT290	mapped3	Automatic	-5.31997	-3.11358	-5.14433	-6.00678	-5.04016	-5.48125	-4.12896	-5.2607	-1.13175
60	ST0060	2	+	88041	88393	other	snR56	bothEndsMapped	Manual	-4.47023	-3.18247	-4.27987	-4.60533	-4.54478	-5.16834	-3.73117	-4.85656	-1.12539
3110	ST3110	15	+	408138	408218	SUTs	SUT363	bothEndsMapped	Manual	-3.46131	-4.57276	-3.95585	-5.75668	-5.93836	-4.82969	-4.26431	-5.38403	-1.11972
6221	ST6221	13	-	302549	302669	CUTs	CUT765	mapped5	Automatic	-7.02135	-3.68532	-4.98378	-5.93715	-5.60098	-5.29123	-4.33455	-5.4461	-1.11155
5536	ST5536	10	-	471068	471820	ORF-T	YJR025C	bothEndsMapped	Manual	-1.24334	-0.35086	-0.47191	-2.76667	-1.39686	-1.60625	-0.411385	-1.50156	-1.09017
3983	ST3983	3	-	178254	178478	CUTs	CUT466	mapped5	Automatic	-3.98834	-5.01892	-5.04601	-6.06312	-6.05792	-6.15247	-5.03246	-6.10519	-1.07273
579	ST0579	4	+	791956	792108	CUTs	CUT070	bothEndsMapped	Automatic	-6.16314	-4.48993	-3.5624	-5.02902	-4.95319	-5.1514	-4.02617	-5.05229	-1.02613
3123	ST3123	15	+	435778	437386	CUTs	CUT376	mapped5	Automatic	-5.25013	-5.27972	-4.93013	-5.01997	-4.09493	-4.04544	-5.10492	-4.07018	1.03474
1643	ST1643	9	+	281153	281257	SUTs	SUT185	bothEndsMapped	Manual	-4.8893	-5.13821	-4.99639	-4.53378	-4.60989	-3.45173	-5.0673	-4.03081	1.03649
5190	ST5190	8	-	364917	365365	other	YHR130C, YHR131C	bothEndsMapped	Manual	-3.86027	-3.20706	-2.65851	-4.53919	-1.97958	-1.57231	-2.93278	-1.77595	1.15684
3248	ST3248	15	+	832339	832579	other	snR8	bothEndsMapped	Manual	-0.471819	-2.33819	0.37779	-1.43998	0.259437	0.277265	-0.9802	0.268351	1.24855
6839	ST6839	15	-	680566	680998	other	snR36	bothEndsMapped	Manual	-5.5949	-5.29085	-2.63283	-5.40163	-2.54971	-2.79757	-3.96184	-2.67364	1.2882
1954	ST1954	11	+	158572	159388	ORF-T	YKL156W	bothEndsMapped	Manual	-2.25683	-2.85398	0.255475	-3.69957	0.276127	-0.144555	-1.29925	0.0657861	1.36504
2658	ST2658	13	+	731449	731553	SUTs	SUT313	bothEndsMapped	Manual	-5.65329	-5.83973	-6.45297	-6.03445	-4.64537	-4.79716	-6.14635	-4.72127	1.42508
761	ST0761	4	+	1401693	1402677	ORF-T	YDR471W	bothEndsMapped	Manual	-0.847531	-3.47101	0.70359	-3.8208	0.607988	0.61579	-1.38371	0.611889	1.9956
3679	ST3679	1	-	199979	200419	CUTs	CUT442	bothEndsMapped	Automatic	-8.81809	-3.38971	-6.80481	-6.61112	-4.18029	-1.69331	-5.09726	-2.9368	2.16046
6293	ST6293	13	-	550109	551245	ORF-T	YMR142C	bothEndsMapped	Manual	-4.31482	-3.79717	-3.54892	-1.04337	0.755284	-3.64919	-3.67304	-1.44695	2.22609
1911	ST1911	11	+	15881	16201	CUTs	CUT224	mapped3	Automatic	-2.37283	-8.27058	-7.3742	-5.44901	-6.21772	-3.00349	-7.82239	-4.6106	3.21179

## Sheet: nocodazole (Fig. 4D)
Supplementary File 5. Microarrays analysis nocodazole-arrested cells
id	tx_ID	seqName	strand	first	last	type	name	mappedType	source	Brn1_repeat01	Brn1_repeat02	Brn1(TEV)_repeat01	Brn1(TEV)_repeat02	average Brn1	average Brn1(TEV)	logRatio
4413	ST4413	4	-	1319401	1319889	ORF-T	YDR424C	bothEndsMapped	Manual	-0.231102	-0.214602	-3.16806	-0.0145655	-0.222852	-1.59131	-1.36846
5671	ST5671	11	-	179104	179464	SUTs	SUT662	bothEndsMapped	Manual	-0.489737	-3.06247	-2.87663	-2.89802	-1.7761	-2.88732	-1.11122
2088	ST2088	11	+	554500	556036	ORF-T	YKR059W	bothEndsMapped	Manual	-0.449885	-0.0557059	-0.420225	-2.1959	-0.252795	-1.30806	-1.05527
2970	ST2970	14	+	779124	781267	ORF-T	YNR075W	bothEndsMapped	Manual	-1.97764	-3.21846	-1.58373	-1.513	-2.59805	-1.54836	1.04969
4957	ST4957	7	-	735287	736026	other	YGR122C-A	bothEndsMapped	Manual	-2.7746	-1.14738	-0.556335	-0.79321	-1.96099	-0.674773	1.28622
6753	ST6753	15	-	407822	408126	other	snR9	bothEndsMapped	Manual	0.954557	-1.43922	0.897808	1.47876	-0.242332	1.18829	1.43062
