# Supplementary figures and images for: Condensin controls cellular RNA levels through the accurate segregation of chromosomes instead of directly regulating transcription
Source: eLife journal article supplement (doi:10.7554/elife.38517), 2018-09-19

**A**

### 3'-extended RNA

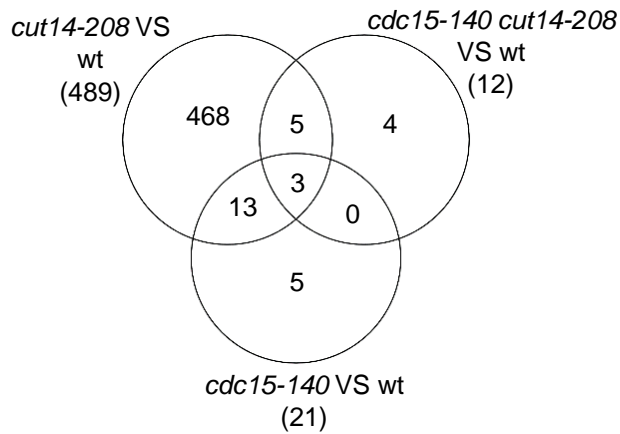

**B**

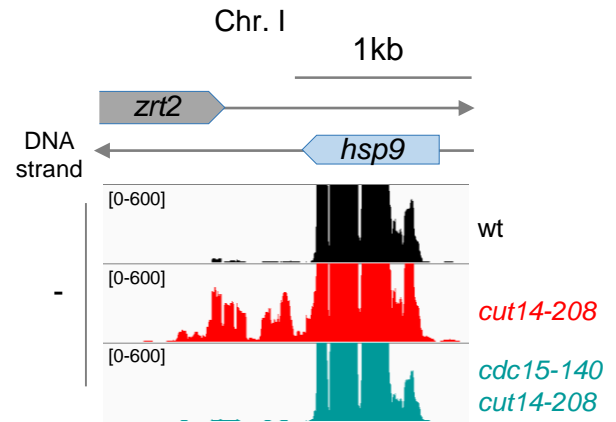

**C**

### RT-qPCR

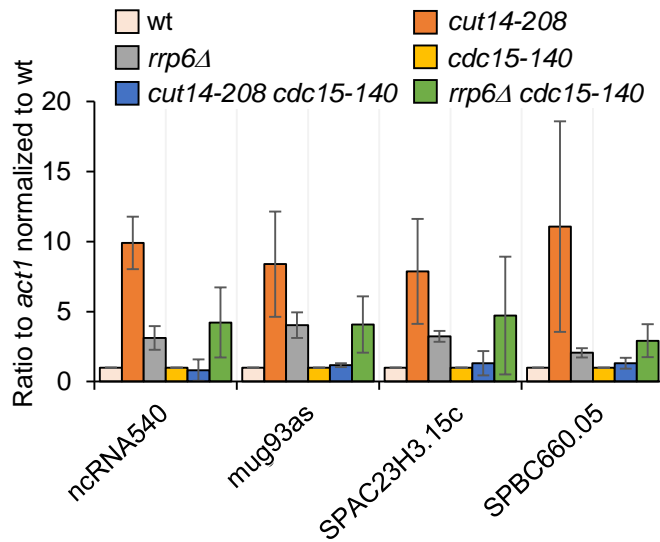

**D**

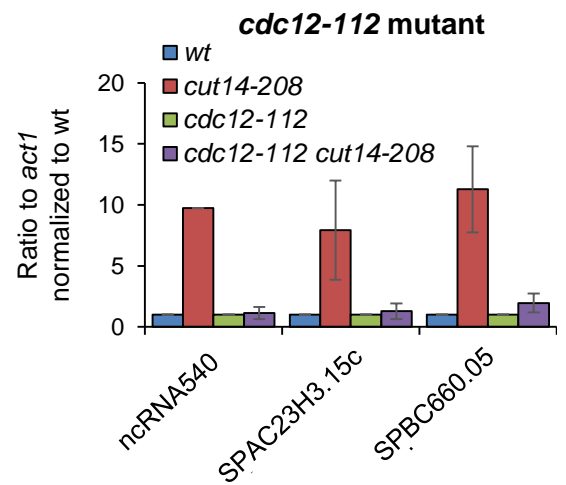

Supplement: supp [file elife-38517-supp-v1.zip › elife_poa_e38517_Figure_5_figure_supplement_2.pdf]

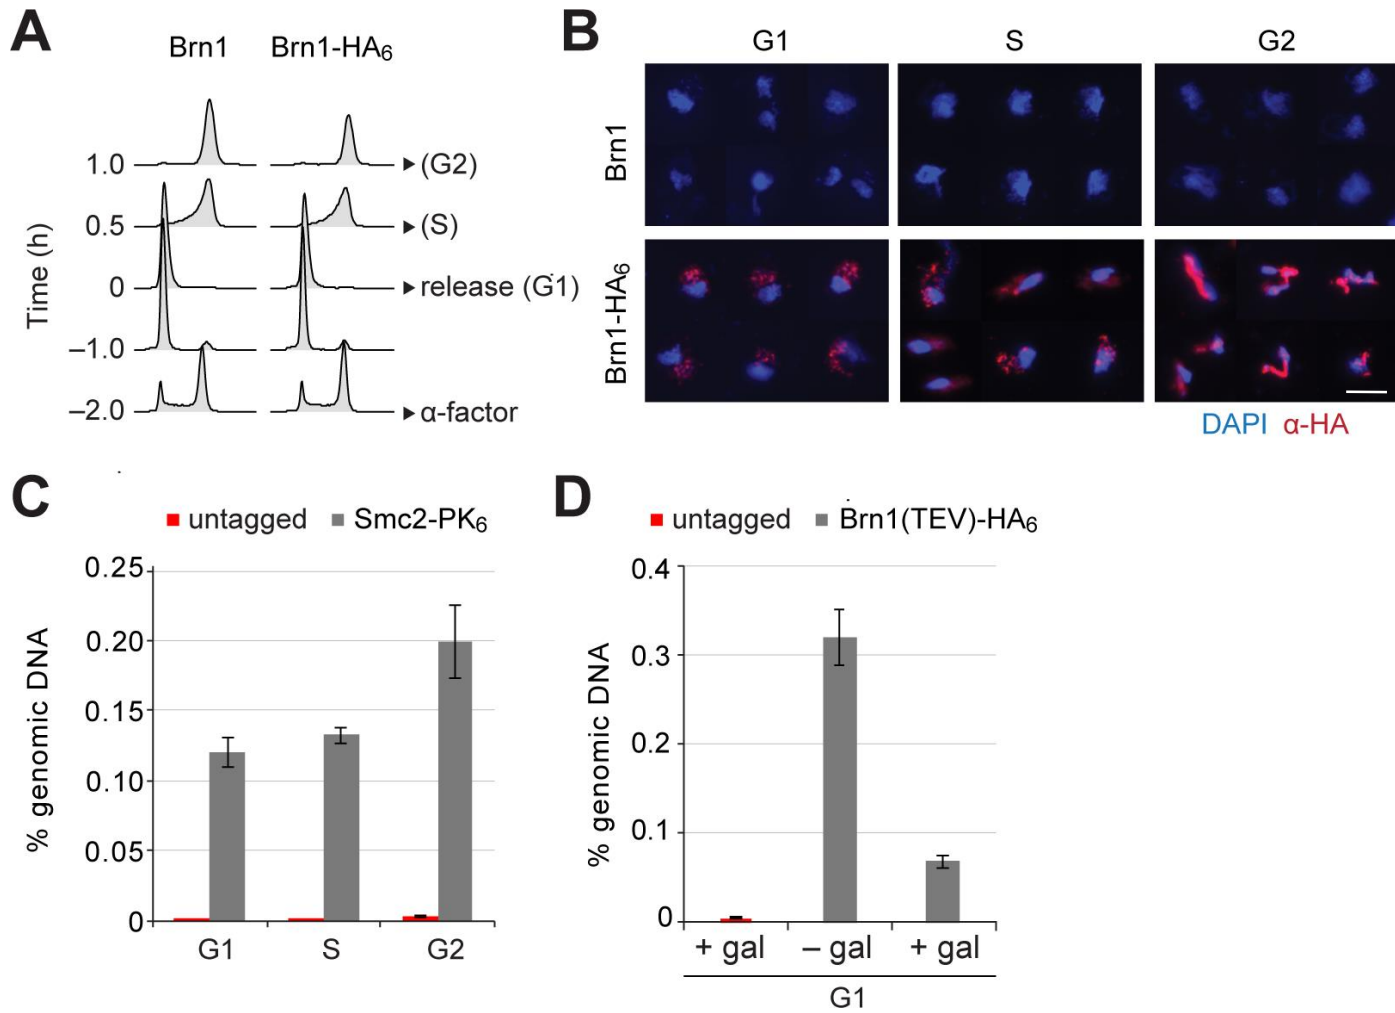

Supplement: supp [file elife-38517-supp-v1.zip › elife_poa_e38517_Figure_4_figure_supplement_1.pdf]

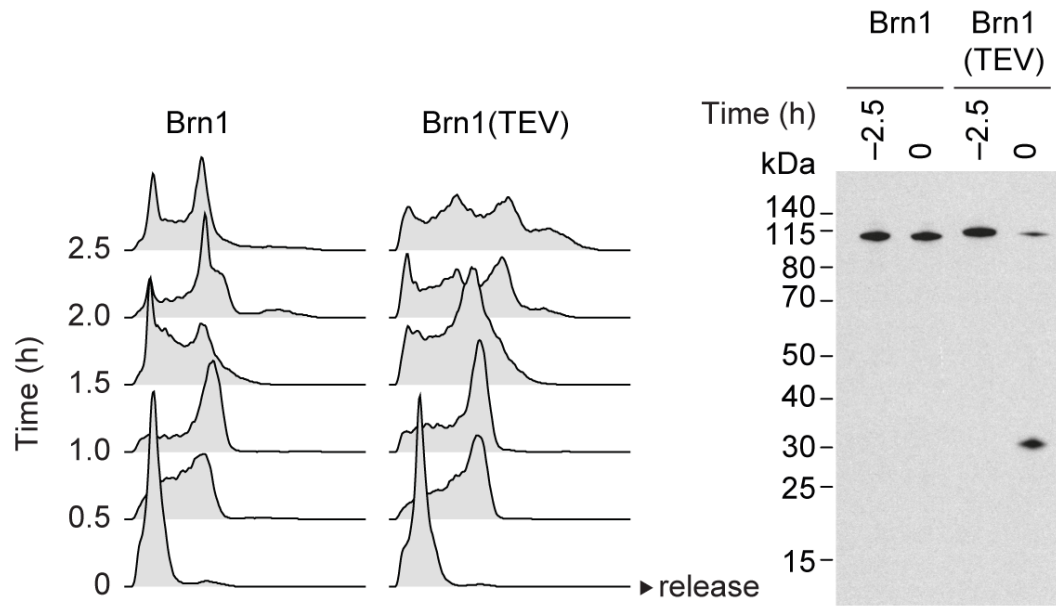

Supplement: supp [file elife-38517-supp-v1.zip › elife_poa_e38517_Figure_7_figure_supplement_2.pdf]

**A**

### ChIP Psm3-GFP (Cohesin)

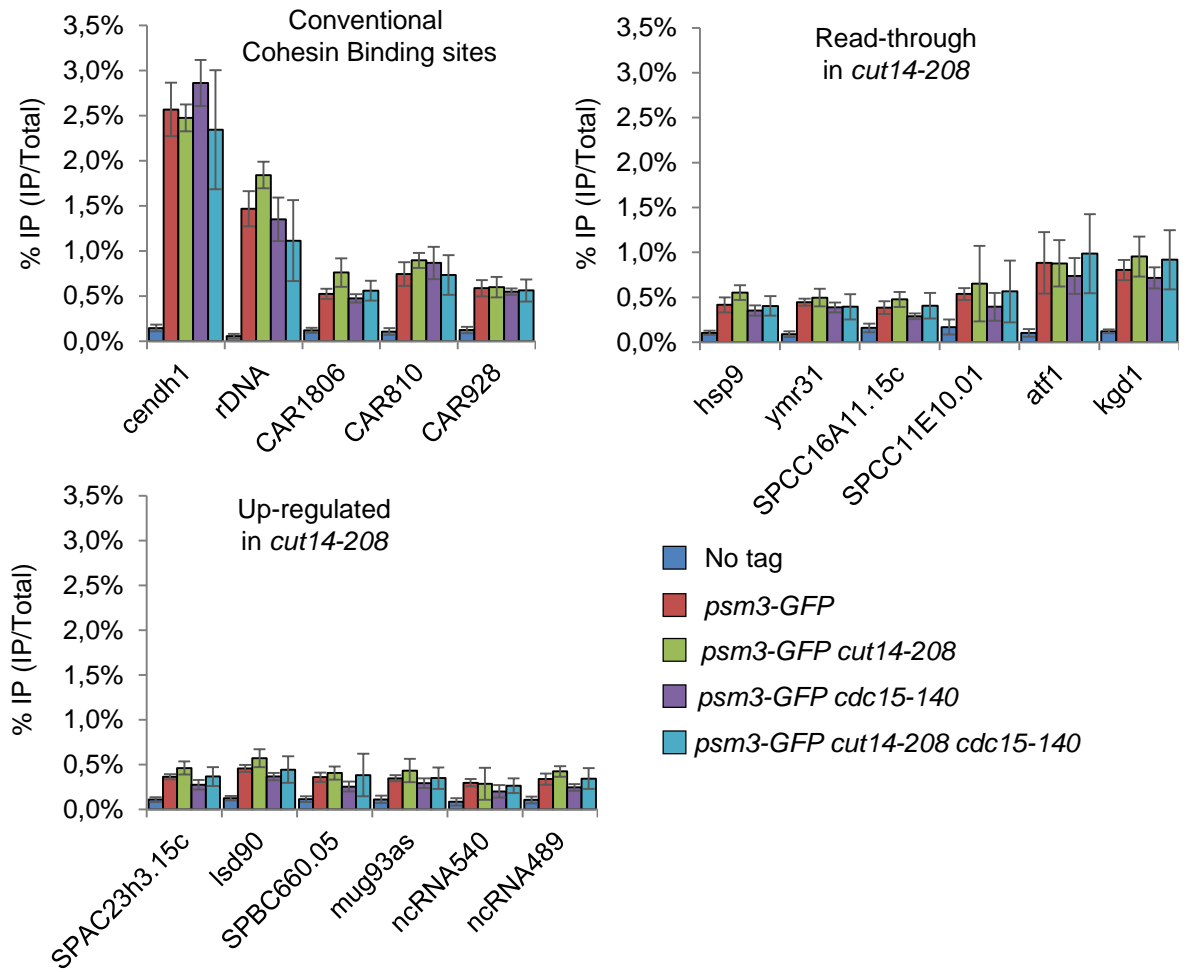

**B**

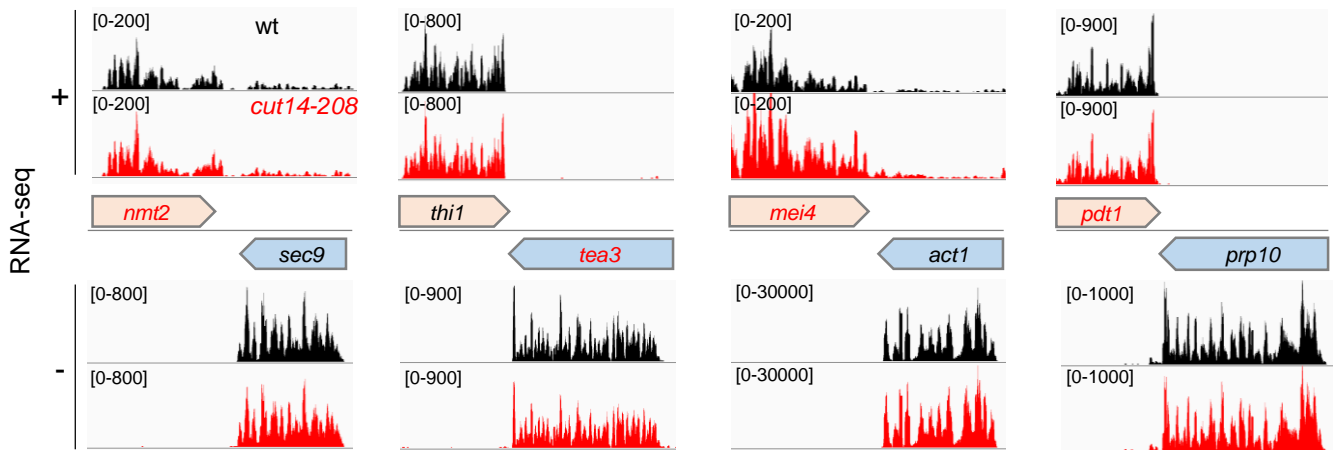

Supplement: supp [file elife-38517-supp-v1.zip › elife_poa_e38517_Figure_2_figure_supplement_2.pdf]

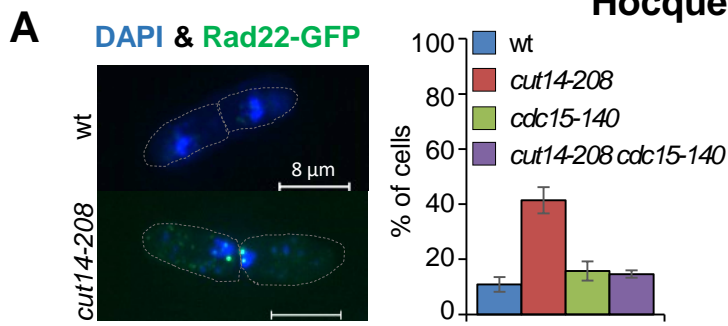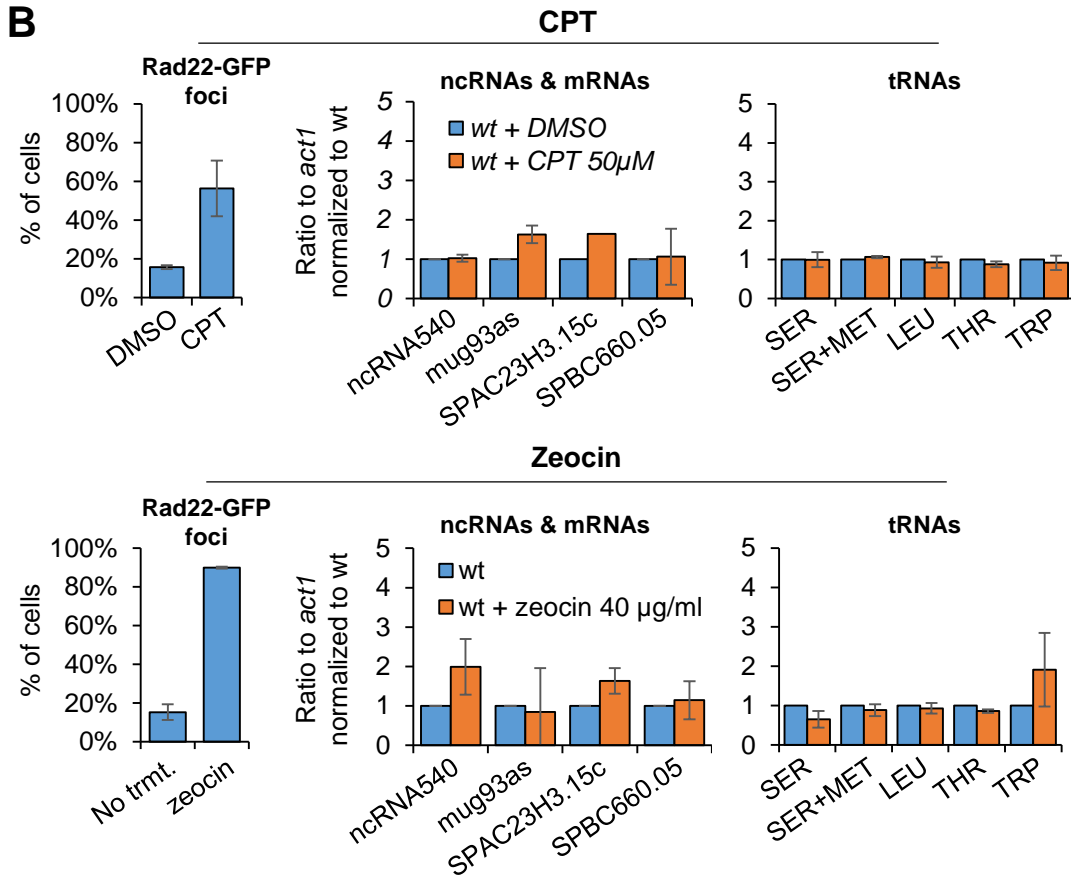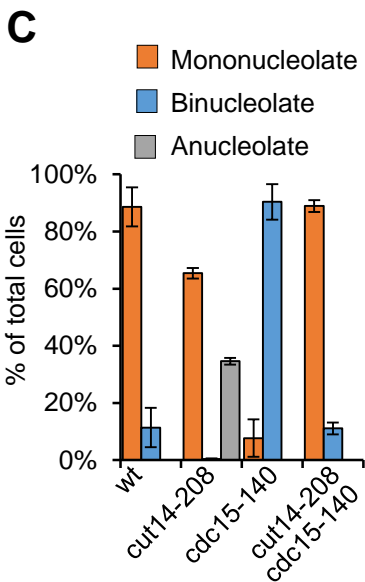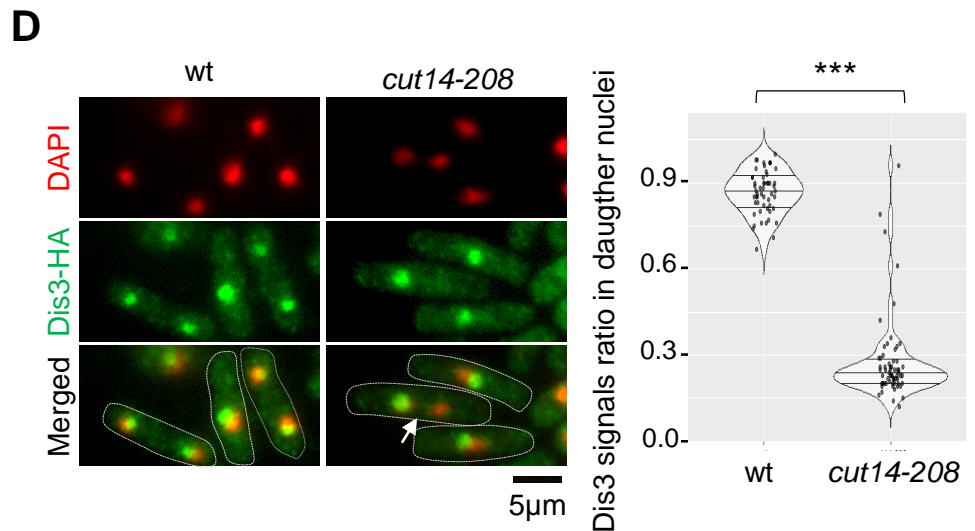

Supplement: supp [file elife-38517-supp-v1.zip › elife_poa_e38517_Figure_7_figure_supplement_1.pdf]

**A**

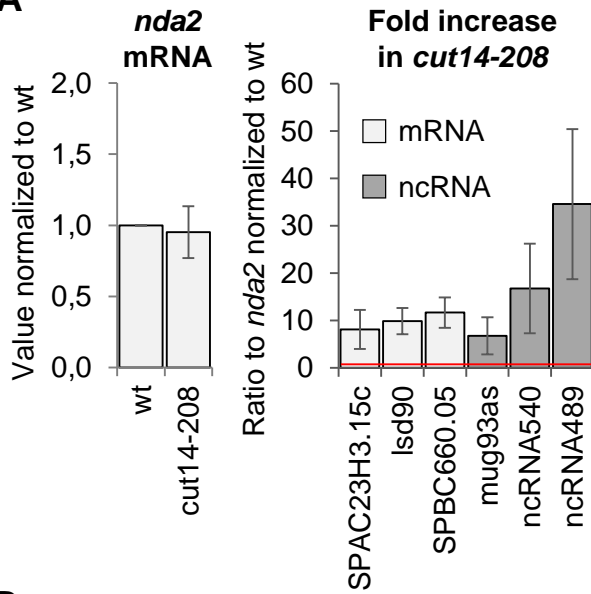

**B**

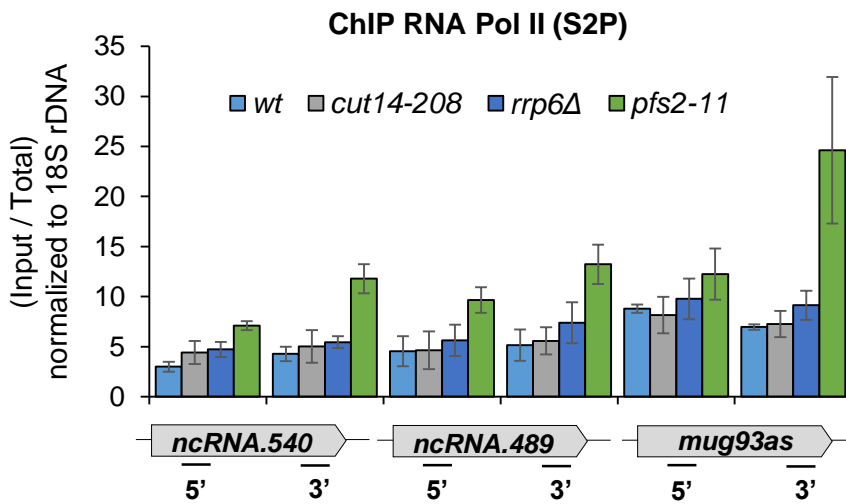

Supplement: supp [file elife-38517-supp-v1.zip › elife_poa_e38517_Figure_1_figure_supplement_1.pdf]

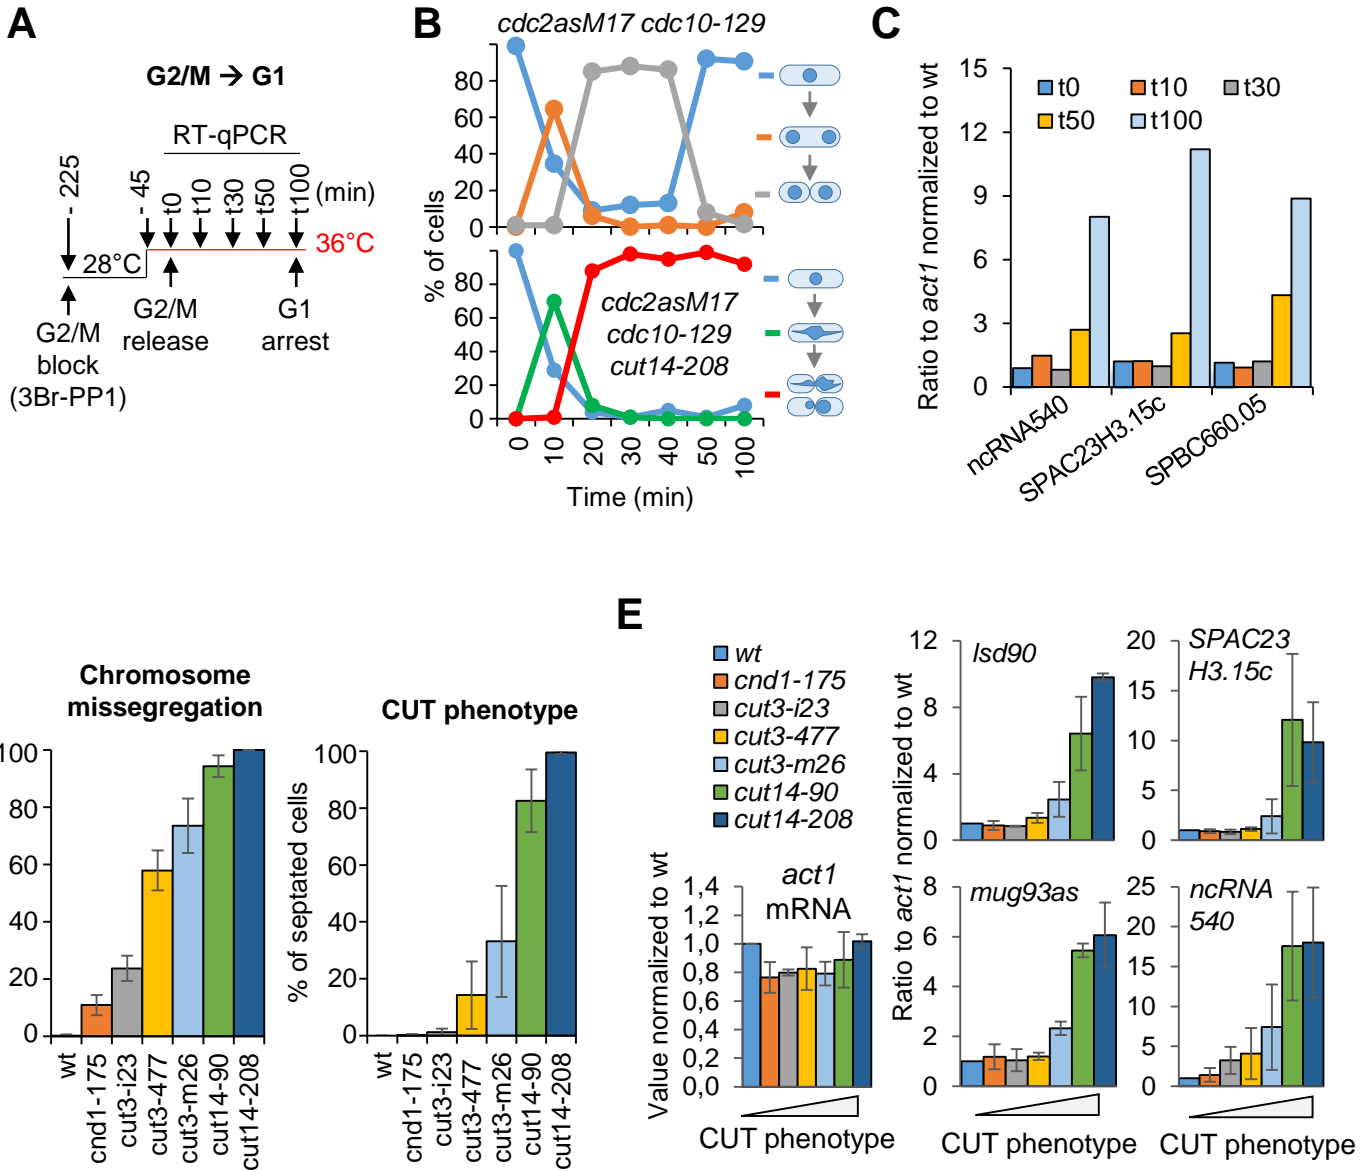

Supplement: supp [file elife-38517-supp-v1.zip › elife_poa_e38517_Figure_5_figure_supplement_1.pdf]

**A**

*hsp9* RNase H and northern blotting

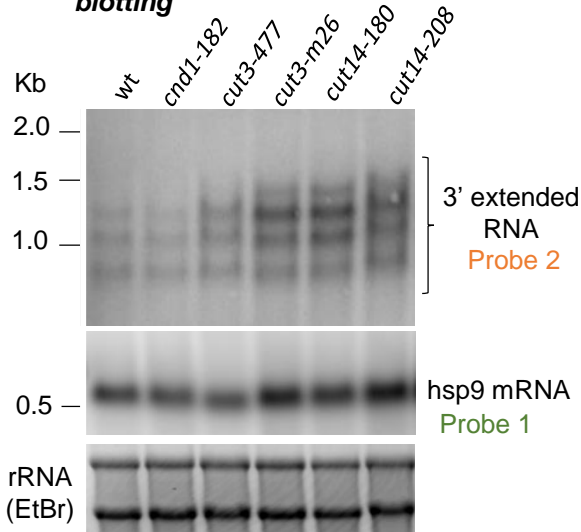

**B**

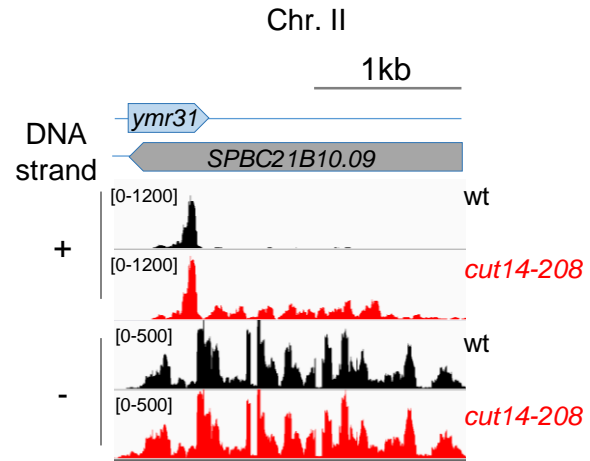

**C**

RNA mis-regulated in *cut14-208*

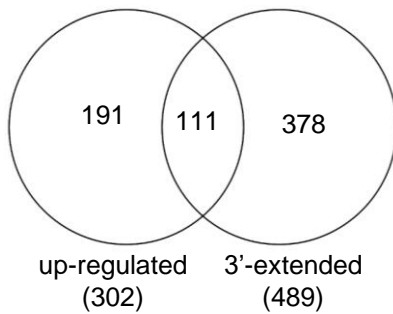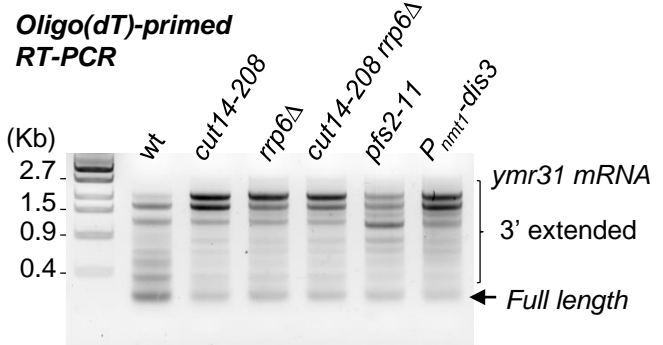

**D**

ChIP RNA Pol II (S2P)

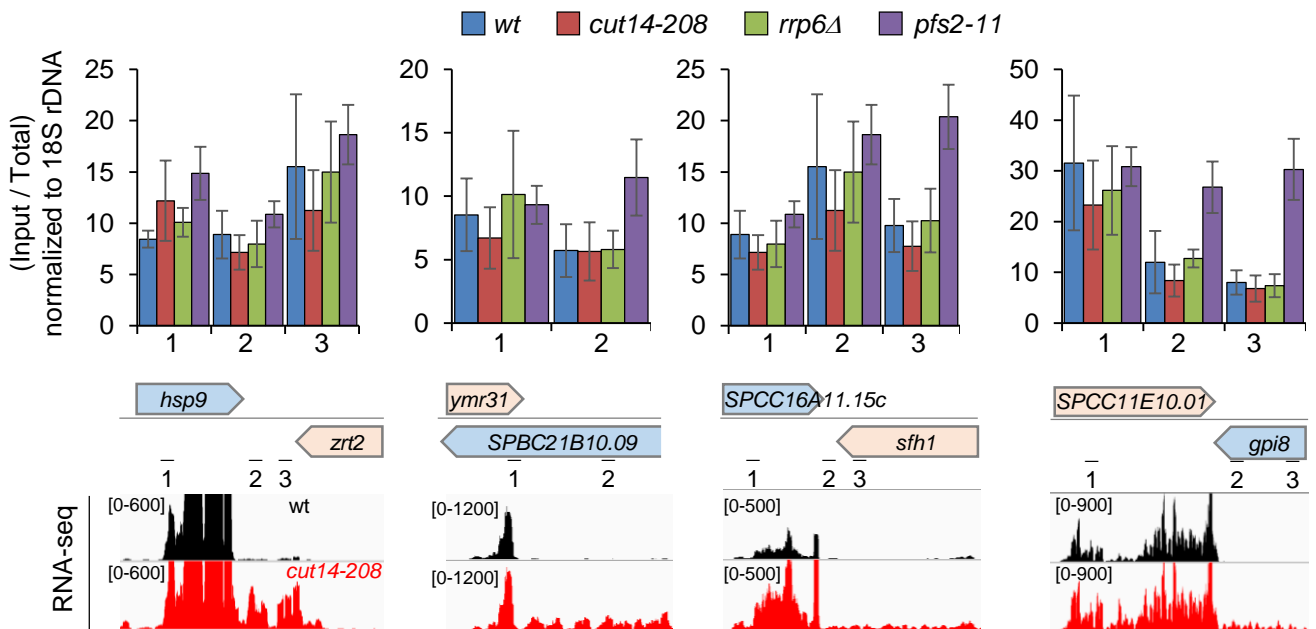

Supplement: supp [file elife_poa_e38517_Figure_2_figure_supplement_1.pdf › elife_poa_e38517_Figure_2_figure_supplement_1.pdf]
